# Supplementary material for: Experiences With Kidney Transplant Among Undocumented Immigrants in Illinois: A Qualitative Study
Source: PubMed Central journal article supplement — Kidney Med. 2023 Apr 20;5(6):100644. doi: 10.1016/j.xkme.2023.100644 (PMC10206204; doi:10.1016/j.xkme.2023.100644), 2023-04-20
Supplement: mmc1.pdf [file mmc1.pdf]

**Item S1: Interviewer Qualifications**

| <b>Interviewer</b>            | <b>Study Role</b>      | <b>Qualifications</b>                                                                                                |
|-------------------------------|------------------------|----------------------------------------------------------------------------------------------------------------------|
| <b>Stakeholder Interviews</b> |                        |                                                                                                                      |
| Elizabeth Lynch, PhD          | Co-Investigator        | Psychologist with experience leading and conducting qualitative research                                             |
| Brittney Lange-Maia, PhD, MPH | Principal Investigator | Epidemiologist with prior experience with qualitative data collection and analysis                                   |
| Yumiko Gely                   | Research Fellow        | Medical student who underwent training to conduct qualitative interviews through a research fellowship on this study |
| <b>Patient Interviews</b>     |                        |                                                                                                                      |
| Maritza Esqueda-Medina        | Research Assistant     | Bilingual, fluent in English and Spanish. Has experience with qualitative data collection.                           |

## Item S2: Stakeholder Interview Guide

### Medical Stakeholders

1. Volume of patients: *First we'd like to talk general about your practice. About how many patients have you encountered in your practice who have had end-stage renal disease and needed a kidney transplant? How many of them were undocumented?*
2. Access Issues: *What are typical access obstacles that you see for patients in need of kidney transplants? How does this effect their health, life, and their family? Are there specific access issues encountered by undocumented patients? Could you describe them?*
3. Outcomes: *Next I'd like to talk about typical outcomes you see for patients needing or have had kidney transplants. I'd like you to talk about outcomes in terms of disease outcomes, disease progression, and transplant outcomes. What are some examples of outcomes that you've seen for undocumented patients who need a transplant? Would you say that outcomes are like patients who have commercial insurance coverage or coverage through Medicare? What about patients who have received coverage through the Illinois Transplant Fund? Could you talk more about outcomes in terms of*
4. Comparison to Emergency-Only Dialysis Settings: *Some states only allow for "emergency-only hemodialysis" care for undocumented immigrants. Have you worked in a setting where this was the practice? If so, could you contrast your experiences in settings where emergency-only hemodialysis was the standard practice versus settings where transplantation is allowed? Have you encountered other policies or policy changes regarding care for undocumented patients? How have those policies impacted your ability to provide care?*
5. Program Expansion: *In what way might things be different if coverage was expanded so that more undocumented patients were able to have access to potential transplants? Are there changes you would make to the Illinois Transplant Fund program if you could?*

### Policy Stakeholders

1. Awareness of program: *Before speaking with us today, how aware were you of the Illinois Transplant Fund and its programs for undocumented patients? What did you already know about the program?*
2. Information needed for advocacy: *What kind of information would you want to know about the program in order to advocate for its expansion? Are there specific outcomes you would be interested in? (Probe: These could be outcomes in regard to patients, their families, donors, or regards to supporting medical personnel who care for this population.)*

3. Program Expansion: *In what way might things be different if coverage was expanded so that more undocumented patients were able to have access to potential transplants? Are there changes you would make to the Illinois Transplant Fund program if you could?*

### **Item S3: Patient Interview Guide**

1. Diagnosis/Prognosis: *First, we'd like to talk about your experience with being diagnosed with chronic kidney disease and end-stage renal disease.*

- *When were you diagnosed with chronic kidney disease/ESRD, and what was it like receiving that diagnosis?*
- *How did this diagnosis affect your life? Your family's life?*

2. Treatment Options: *Next, we'd like to talk about the treatment options that were available to you upon your diagnosis and throughout the progression of the disease.*

- *What treatment options did you have for ESRD?*
- *Were there obstacles in getting the treatment you needed? Could you describe them?*
- *Did anyone have a major role in helping you receive treatment?*
- *How was the option of having a transplant introduced to you? What things did you consider when you thought about getting a transplant?*

3. Learning About ITF:

- *How did you hear about ITF?*
- *What were you initially told about the ITF?*
- *Did you have any doubts about ITF?*
- *What do you think can be done to address those doubts to ensure you or others are fully informed about ITF in the future?*

4. Experience with ITF:

- *Please tell us about your experience with ITF.*
- *How did ITF support you with your treatment with ESRD?*

5: Transplant Experience:

- *Could you tell us about your experience with the kidney transplant itself?*
  - *If still on the waiting list, ask participant to describe their experience with waiting for an organ and qualifying to be on the waiting list.*
- *Did you consider having a living/family donor? What kind of donor did you ultimately have?*
- *If you had a friend who was going through ESRD and was in a similar situation, what advice would you give them?*
- *Has your opinion of organ transplants changed since going through the transplant process (or qualifying for a transplant)?*

6. Impact of ITF:

- *How has ITF impacted your life?*
- *Are you able to lead the life you want to be living post-transplant?*
- *What is your life like now that you have received the kidney transplant? (Or how has your life changed now that you are on the waiting list?)*

7. Future Improvements:

- *What else could ITF do to better support you during this process?*

- *What changes could have been made to have made this process easier for you?*

8. Recruitment Strategies:

- *We are planning to do future work to learn more about experiences patients have had with transplants. What do you think are good ways to get in touch with others to learn about their experiences? (For example, a letter like we did for this study, a phone call, or other form of communication.)*
